# Supplementary material
Source: MDPI journal article supplement (https://www.mdpi.com/2305-6703/2/1/8)
Supplement: s1 [file s1]

## Supplementary Materials: Table S1: Elements and example measures for building environmental justice indicators

The following table lists measures within the four EJ domains described in Figure 3; *environment*, *disadvantage* (using demographic measures), *health/epidemiology* and *procedures*) that have been used in the EJ literature to create indicators. The list includes both objective and subjective measures. They can be combined strategically to create indicators capable of detecting environmental injustice. Some combinations will be informed by known or suspected local issues. Others will be created to monitor and rapidly detect emerging issues. In all cases, creation of indicators should comply with the 'Principles for building and using indicators and indicator suites' in the paper.

Notes:

Some additional measures that are commonly used in environmental and health research are also included, however these references may not focus specifically on EJ issues. References that do not focus explicitly on an EJ issue are denoted with an asterisk \*.

While this list covers many useful measures and provides ideas for the ways that measures that can be combined, it is not an exhaustive list.

| Environment              |                                                                                                                                                                                         |                                                                 |
|--------------------------|-----------------------------------------------------------------------------------------------------------------------------------------------------------------------------------------|-----------------------------------------------------------------|
| Harmful Environment      |                                                                                                                                                                                         |                                                                 |
| Measures                 | Measure definitions                                                                                                                                                                     | Reference                                                       |
| <b>Polluting sites</b>   |                                                                                                                                                                                         |                                                                 |
| Waste disposal/landfills | Forty-one georeferenced sites of landfills regulated under the EU's IPPC directive (from Scotland EPA) and a calculated exposure plume based on landfill emissions and prevailing winds | Richardson, <i>et al.</i> [1]                                   |
| Licensed sites           | 1.0 km radial buffer around EPA-licensed polluting sites                                                                                                                                | Gunn, <i>et al.</i> [2]                                         |
|                          | Plume-based buffers (or footprints): polygon, centroid and basic plume<br>Circular buffers: polygon, centroid and basic radial                                                          | Chakraborty and Armstrong [3]                                   |
|                          | Number of RCRA facilities                                                                                                                                                               | Morrison, <i>et al.</i> [4], Spina [5], Zhao, <i>et al.</i> [6] |
| Fracking sites           | 1.5 km buffer around each fracking well                                                                                                                                                 | Zwickl [7]                                                      |
| <b>Air pollution</b>     |                                                                                                                                                                                         |                                                                 |
| Ambient air pollution    | Respiratory hazard and neurological hazard values, derived from US EPA's NATA data modelled with reference to 187 air toxics. It applies census data,                                   | Kweon, <i>et al.</i> [8]                                        |

|                   |                                                                                                                                                                                                                                                                                                                                    |                                 |
|-------------------|------------------------------------------------------------------------------------------------------------------------------------------------------------------------------------------------------------------------------------------------------------------------------------------------------------------------------------|---------------------------------|
|                   | human activity patterns, ambient air quality levels, climate data, and indoor/outdoor concentration relationships to estimate an expected range of apparent inhalation exposure concentrations at the level of census tract.                                                                                                       |                                 |
| PM <sub>2.5</sub> | World Health Organization standard:<br>10 µg/m <sup>3</sup> annual mean<br>25 µg/m <sup>3</sup> 24-hour mean                                                                                                                                                                                                                       | WHO [9] *                       |
|                   | Prescribed PM <sub>2.5</sub> exceedance day: days on which (prescribed fire contributed to) PM <sub>2.5</sub> concentrations exceeded 35 µg/m <sup>3</sup> (24-hour average NAAQ for PM <sub>2.5</sub> ) for at least one of the 4 km CMAQ grid cells.                                                                             | Gaither, <i>et al.</i> [10]     |
|                   | Models the outcomes of achieving 11.0 µg/m <sup>3</sup> , 10.6 µg/m <sup>3</sup> , 10.0 µg/m <sup>3</sup> (the WHO standard) and 4.9 µg/m <sup>3</sup>                                                                                                                                                                             | Morelli, <i>et al.</i> [11]     |
|                   | Real time PM <sub>2.5</sub> concentrations at 42 monitoring sites (Pittsburgh, USA) associated with EJ and non-EJ communities. Results ranged from 0 µg/m <sup>3</sup> to 110 µg/m <sup>3</sup>                                                                                                                                    | Tanzer, <i>et al.</i> [12]      |
|                   | 24h average PM <sub>2.5</sub> concentrations for 2003 from 166 U.S EPA federal reference monitors                                                                                                                                                                                                                                  | Hu, <i>et al.</i> [13]          |
|                   | Annual averages of 24-h ambient PM <sub>2.5</sub> obtained for each year between 2002 & 2006 for 1,215 PM <sub>2.5</sub> monitoring locations, tract level<br><6.1 µg/m <sup>3</sup><br>6.1 - 8.0 µg/m <sup>3</sup><br>8.1 - 10.0 µg/m <sup>3</sup><br>10.1 - 12.0 µg/m <sup>3</sup><br>12.1 - 14.0 µg/m <sup>3</sup> and<br>>14.0 | Bravo, <i>et al.</i> [14]       |
|                   | Annual PM <sub>2.5</sub> from 36 monitoring sites interpolated to census block group level averages using land use regression. PM <sub>2.5</sub> ranged from 6 to 16 µg/m <sup>3</sup>                                                                                                                                             | Zhao, Gladson and Cromar [6]    |
| PM <sub>10</sub>  | World Health Organisation standard:<br>20 µg/m <sup>3</sup> annual mean<br>50 µg/m <sup>3</sup> 24-hour mean                                                                                                                                                                                                                       | WHO [9] *                       |
|                   | Categorised ambient air pollution in 279 IGZs:<br>10.6 - 12.2 µg/m <sup>3</sup><br>12.2 - 13.2 µg/m <sup>3</sup>                                                                                                                                                                                                                   | Morrison, Fordyce and Scott [4] |

|                 |                                                                                                                                                                                                                                           |                                          |
|-----------------|-------------------------------------------------------------------------------------------------------------------------------------------------------------------------------------------------------------------------------------------|------------------------------------------|
|                 | 13.2 - 14.3 µg/m <sup>3</sup><br>14.3 - 15.8 µg/m <sup>3</sup><br>15.8 - 18.9 µg/m <sup>3</sup>                                                                                                                                           |                                          |
|                 | 24-hour averages of city-wide levels calculated by averaging data across all monitoring stations from CETESB, the environmental agency in São Paulo                                                                                       | Gouveia, <i>et al.</i> [15]              |
| NO <sub>2</sub> | 40 µg/m <sup>3</sup> (annual mean)<br>200 µg/m <sup>3</sup> (1-hour mean)                                                                                                                                                                 | WHO [9] *                                |
|                 | Categorised ambient air pollution in 279 IGZs:<br>5.9 - 14.3 µg/m <sup>3</sup><br>14.3 - 19.4 µg/m <sup>3</sup><br>19.4 - 24.0 µg/m <sup>3</sup><br>24.0 - 30.7 µg/m <sup>3</sup> and<br>30.7 - 43.2 µg/m <sup>3</sup>                    | Morrison, Fordyce and Scott [4]          |
|                 | Modelled and weighted analyses of PM <sub>2.5</sub> for each of 34,000 (approx.) Lower-layer Super Output Areas (LSOAs) (≈700 households). Results ranged from 0 µg/m <sup>3</sup> to 25 µg/m <sup>3</sup>                                | Barnes, <i>et al.</i> [16]               |
| O <sub>3</sub>  | World Health Organisation standard:<br>100 µg/m <sup>3</sup> (8-hour mean)                                                                                                                                                                | WHO [9] *                                |
|                 | Annual averages of 8h maximum concentrations for 2002 -2006, for 1,043 O <sub>3</sub> monitoring locations at census tract level:<br>< 34.1 ppb<br>34.1 - 42.0 ppb<br>42.1 - 46.0 ppb<br>46.1 - 50.0 ppb<br>50.1 - 54.0 ppb and<br>> 54.0 | Bravo, Anthopolos, Bell and Miranda [14] |
| SO <sub>2</sub> | World Health Organisation standard:<br>20 µg/m <sup>3</sup> (24-hour mean)<br>500 µg/m <sup>3</sup> (10-minute mean)                                                                                                                      | WHO [9] *                                |
|                 | 24-hour averages city-wide levels calculated by averaging data across all monitoring stations from CETESB, the environmental agency in São Paulo                                                                                          | Gouveia, Bremner and Novaes [15]         |

|                                            |                                                                                                                                                                                                                                                                                                                                                                                                                                                        |                                                                                             |
|--------------------------------------------|--------------------------------------------------------------------------------------------------------------------------------------------------------------------------------------------------------------------------------------------------------------------------------------------------------------------------------------------------------------------------------------------------------------------------------------------------------|---------------------------------------------------------------------------------------------|
| NMVOCs                                     | Average concentration in bulk air samples (pptv), in this case, samples (n=187) pressurized into individual 2L evacuated electro-polished stainless-steel canisters to 20 psi using a metal bellows pump.                                                                                                                                                                                                                                              | Guo, <i>et al.</i> [17] *                                                                   |
|                                            | A Surrogate method: active photoionization detector (PID) for NMVOCs with ionization potentials below 10.6 eV estimates NMVOCs in terms of ppbv                                                                                                                                                                                                                                                                                                        | Zielinska, <i>et al.</i> [18] *                                                             |
| NO <sub>x</sub>                            | Modelled exposure using an emission database (EDB) containing information on emissions from 24,000 sources. Categories for nitrous oxides (NO <sub>x</sub> ) were a) 2.5-8.9 Hg/m <sup>3</sup> (mean, 6.8 µg/m <sup>3</sup> ), the reference category; b) 9.0-14.1 pg/m <sup>3</sup> (mean, 11.4 µg/m <sup>3</sup> ); c) 14.2-22.6 µg/m <sup>3</sup> (mean, 18.2 pg/m <sup>3</sup> ); and d) > 22.7 µg/m <sup>3</sup> (mean, 29.6 µg/m <sup>3</sup> ). | Malmqvist, <i>et al.</i> [19]                                                               |
|                                            | Hourly mean concentrations of NO <sub>2</sub>                                                                                                                                                                                                                                                                                                                                                                                                          | Turner, <i>et al.</i> [20]                                                                  |
| Pollen count                               | Grains per cubic metre using a seven-day Hirst-type volumetric pollen and spore trap located (e.g. on rooftops) between 2 and 14 m above the ground                                                                                                                                                                                                                                                                                                    | Haberle, <i>et al.</i> [21] *                                                               |
|                                            | Grains per cubic metre using a seven-day Intermittent Cycling Rotorod sampler                                                                                                                                                                                                                                                                                                                                                                          | Haberle, Bowman, Newnham, Johnston, Beggs, Buters, Campbell, Erbas, Godwin and Green [21] * |
| Toxic releases and hazardous air pollution | E.g. Toxic releases in tons per year, obtained from <i>Pollutant Release and Transfer Register (PRTR) Information</i> system (South Korea)                                                                                                                                                                                                                                                                                                             | Yoon, <i>et al.</i> [22]                                                                    |
|                                            | Estimated plume extent of TRI facilities, estimated using the <i>ALOHA</i> model                                                                                                                                                                                                                                                                                                                                                                       | Chakraborty and Armstrong [3]                                                               |
|                                            | Industry estimates of 90 toxic substances, each with a toxicity rating, provided to the National Pollution Inventory (Australia)                                                                                                                                                                                                                                                                                                                       | Chakraborty and Green [23]                                                                  |
|                                            | 26-years of US TRI data = 1,483,463 individual instances of an emitter releasing toxic substances into the air.                                                                                                                                                                                                                                                                                                                                        | Luo and Hendryx [24], Luo, <i>et al.</i> [25]                                               |
| Plume measurement                          | Plume-based buffers (or footprints): polygon, centroid and basic plume<br>Circular buffers: polygon, centroid and basic radial                                                                                                                                                                                                                                                                                                                         | Chakraborty and Armstrong [3]                                                               |
| Road vehicle density                       | The number of vehicles per unit length of a road. Several methods are reviewed in this paper, including induction loops, GPS trackers and cloud computing methods                                                                                                                                                                                                                                                                                      | Darwish and Bakar [26] *                                                                    |

|                                                                        |                                                                                                                                                                                                                                                                                                                                                           |                                                                                                    |
|------------------------------------------------------------------------|-----------------------------------------------------------------------------------------------------------------------------------------------------------------------------------------------------------------------------------------------------------------------------------------------------------------------------------------------------------|----------------------------------------------------------------------------------------------------|
|                                                                        | Self-reported: (1) <i>How often do trucks pass through your residential street on weekdays?</i> (Never/Seldom/Frequently/Constantly); and (2) <i>During the day, is the traffic noise in your residential street so intense that you have to close the windows in order not to be disturbed?</i> (Yes, constantly/Yes, frequently/Yes, seldom/No, never). | Duhme, <i>et al.</i> [27]                                                                          |
| Road network density                                                   | Miles per square mile                                                                                                                                                                                                                                                                                                                                     | Zwickl [7]                                                                                         |
| Distance to major road                                                 | Sites (childcare in this case) within 60 metres of a major road                                                                                                                                                                                                                                                                                           | Walter, <i>et al.</i> [28]                                                                         |
| Number of days when pollution concentration exceeds NEPM guidelines    | Number of days when pollution concentration exceeds NEPM guidelines                                                                                                                                                                                                                                                                                       | Wiseman, <i>et al.</i> [29]                                                                        |
| Proportion of households using solid fuel as a source for home heating | U.S. Census <i>Public Use Microdata Sample</i> (PUMS) for the <i>American Community Survey</i> (ACS) question 13, 'Which FUEL is used MOST for heating this house, apartment, or mobile home?' Answer 5 or 6                                                                                                                                              | Rogalsky, <i>et al.</i> [30]                                                                       |
| Cooking fuels                                                          | Energy source for cooking using the ISAAC <i>International Study of Asthma and Allergies in Childhood</i> questionnaire                                                                                                                                                                                                                                   | Duhme, Weiland, Keil, Kraemer, Schmid, Stender and Chambless [27]                                  |
| Bushfires and planned burns                                            | Permits for planned burns – obtained from State forest services: Georgia Forestry Commission (GFC) and the Florida Forest Service                                                                                                                                                                                                                         | Gaither, Afrin, Garcia-Menendez, Odman, Huang, Goodrick and Ricardo da Silva [10]                  |
|                                                                        | All 2003 fire detections in study area of SE USA (800 x 1200 km <sup>2</sup> ) by NASA                                                                                                                                                                                                                                                                    | Hu, Waller, Lyapustin, Wang, Al-Hamdan, Crosson, Estes Jr, Estes, Quattrochi and Puttaswamy [13] * |
| Locations of schools (measuring those exposed)                         | State-wide data for school location geo-referenced and with parcels added (California)                                                                                                                                                                                                                                                                    | CEHTP [31]                                                                                         |
| Number of schools and childcare centres in proximity to major roads    | Straight line distance between each school and the nearest <i>limited access highway</i> .                                                                                                                                                                                                                                                                | Kweon, Mohai, Lee and Sametshaw [8]                                                                |
|                                                                        | Proximity of childcare centres to a major road                                                                                                                                                                                                                                                                                                            | Walter, Schneider-Futschik and Irving [28]                                                         |

|                                                                            |                                                                                                                                                                                                                                                                                                                                                                                                                                                                                                                                                             |                                                         |
|----------------------------------------------------------------------------|-------------------------------------------------------------------------------------------------------------------------------------------------------------------------------------------------------------------------------------------------------------------------------------------------------------------------------------------------------------------------------------------------------------------------------------------------------------------------------------------------------------------------------------------------------------|---------------------------------------------------------|
| Number of schools / childcare centres in proximity to polluting facilities | Straight line distance measured between each school and the nearest Toxic Release Inventory (TRI) industrial facility.                                                                                                                                                                                                                                                                                                                                                                                                                                      | Kweon, Mohai, Lee and Sametshaw [8]                     |
| Pollution reports                                                          | Pollution reports where emissions exceeded a specific threshold of the European Pollutant Release and Transfer Register (E-PRTR) (Germany)                                                                                                                                                                                                                                                                                                                                                                                                                  | Rüttenauer [32]                                         |
| <b>Waterway pollution</b>                                                  |                                                                                                                                                                                                                                                                                                                                                                                                                                                                                                                                                             |                                                         |
| Ocean waterways                                                            | Weekly summer recreational (i.e. enterococci) water quality assessment at 36 Port Phillip Bay beaches: Good - Suitable for swimming; Fair - May not be suitable for swimming; Poor - Not Suitable for swimming; N/A - Forecast data unavailable                                                                                                                                                                                                                                                                                                             | EPAV [33] *                                             |
| Polluted groundwater                                                       | Nitrite levels in community water systems; mg/L NO <sub>3</sub> -N                                                                                                                                                                                                                                                                                                                                                                                                                                                                                          | Schaider, <i>et al.</i> [34]                            |
| Water quality                                                              | Turbidity (Secchi depth), lead, Chlorophyll-a and denitrification levels compared to site-specific SEPP (or possible new, future) objectives                                                                                                                                                                                                                                                                                                                                                                                                                | CES [35] *<br>See also EPA data                         |
| Suitability for swimming                                                   | Weekly summer recreational (i.e. enterococci) water quality assessment at 36 Port Phillip Bay beaches: Good - Suitable for swimming; Fair - May not be suitable for swimming; Poor - Not Suitable for swimming; N/A - Forecast data unavailable                                                                                                                                                                                                                                                                                                             | EPAV [33] *                                             |
| Stormwater drains                                                          | Map of open, closed stormwater drains and stormwater canals                                                                                                                                                                                                                                                                                                                                                                                                                                                                                                 | Boyd, <i>et al.</i> [36] *                              |
| Floods                                                                     | <p>Areas identified by the (UK) Environment Agency:</p> <ul style="list-style-type: none"> <li>• Areas of little or no risk (Zone 1: less than a 1-in-a-1,000-year chance of any flooding),</li> <li>• Low to medium risk (Zone 2: more than a 1-in-a-1,000-year chance of river or sea flooding), and</li> <li>• High risk areas (Zone 3: those with a more than a 1-in-a-100-year chance of river flooding and/or more than a 1-in-a-200-year chance of sea flooding).</li> </ul> <p>Flood vector data was rasterised to UK census output areas (OAs)</p> | Fielding [37]                                           |
|                                                                            | Cyclone Harvey Inundation Footprint, from US Federal Emergency Management Agency                                                                                                                                                                                                                                                                                                                                                                                                                                                                            | Chakraborty, <i>et al.</i> [38]                         |
| <b>Odour pollution</b>                                                     |                                                                                                                                                                                                                                                                                                                                                                                                                                                                                                                                                             |                                                         |
| Odour complaints                                                           | Three years of complaints to State environment protection authority; the EPAV. 4517 geo-referenced complaints in Victoria                                                                                                                                                                                                                                                                                                                                                                                                                                   | Gunn, Greenham, Davern, Mavoa, Taylor and Bannister [2] |
| <b>Soil pollution</b>                                                      |                                                                                                                                                                                                                                                                                                                                                                                                                                                                                                                                                             |                                                         |

|                                    |                                                                                                                                                                                                                                                                                                                                                                                                                                         |                                                                          |
|------------------------------------|-----------------------------------------------------------------------------------------------------------------------------------------------------------------------------------------------------------------------------------------------------------------------------------------------------------------------------------------------------------------------------------------------------------------------------------------|--------------------------------------------------------------------------|
| Soil contamination                 | UK Contaminated Land Exposure Assessment (CLEA) standards                                                                                                                                                                                                                                                                                                                                                                               | Morrison, Fordyce and Scott [4]                                          |
|                                    | A derived Soil Metal Index. See the reference for its derivation                                                                                                                                                                                                                                                                                                                                                                        | Morrison, Fordyce and Scott [4]                                          |
| <b>Noise pollution</b>             |                                                                                                                                                                                                                                                                                                                                                                                                                                         |                                                                          |
| Noise reports                      | Self-reported: <i>During the day, is the traffic noise in your residential street so intense that you have to close the windows in order not to be disturbed?</i> (Yes; constantly/Yes; frequently/Yes; seldom/No; never).                                                                                                                                                                                                              | Duhme, Weiland, Keil, Kraemer, Schmid, Stender and Chambless [27]        |
| Ambient noise                      | Modelled noise data using EASYMAP which integrates (1) the environmental noise prediction software MITHRA (Scientific and Technical Centre for Building, Grenoble, France), (2) the geographical information system ArcGIS (ESRI, Redlands, California, USA) and (3) the environmental management information system Drag & Fly (SIRIATECH, Roubaix, France) to generate noise calculations and noise mapping in two or three dimension | Havard, <i>et al.</i> [39]                                               |
|                                    | Aircraft traffic increase (aircraft movements, total passengers and passengers per movement) and number of households in geo-referenced noise contour area as a proxy for exposure to noise                                                                                                                                                                                                                                             | Sobotta, <i>et al.</i> [40]                                              |
|                                    | Road traffic, above-ground subway, tram, air and railway traffic noise data between 10pm and 6am for every 10m x 10m grid derived from strategic noise maps generated according to the Berlin Noise Mapping Decree, ranging from 7db(A) to 93db(A)                                                                                                                                                                                      | Lakes, <i>et al.</i> [41]                                                |
| <b>Pesticide use</b>               |                                                                                                                                                                                                                                                                                                                                                                                                                                         |                                                                          |
| Pesticide use                      | State-wide application of 201 pesticides (inc. type & persistence), in 'pounds per year' in 15 counties, as reported by pesticide users, under the California Pesticide Use Reporting (PUR) program, as required by the California Dept. of Pesticide Regulation                                                                                                                                                                        | CEHTP [31], Richardson, <i>et al.</i> [42], Tolhurst, <i>et al.</i> [43] |
| <b>Stockpiling</b>                 |                                                                                                                                                                                                                                                                                                                                                                                                                                         |                                                                          |
| Stockpiling of hazardous materials | Usually defined as sites (with or without processing capability) into which waste flows, or has flowed in the past, but does not emerge, due to intractable waste problems attributable to infrastructure, technology, regulatory or market-economic shortcomings. Also called legacy wastes, they remain in volumes that                                                                                                               | Blue Environment [44] *                                                  |

|                 |                                                                                                                                                                                                                                                               |             |
|-----------------|---------------------------------------------------------------------------------------------------------------------------------------------------------------------------------------------------------------------------------------------------------------|-------------|
|                 | dwarf annual waste generation figures. Recent history shows that processing facilities can become stockpile sites.                                                                                                                                            |             |
|                 | *VAGO, although noting that stockpiles have increased in Victoria, also note that Currently reported state waste data ... excludes information on the nature and extent of stockpiles -permitted or otherwise - across the state (i.e. data is not collected) | VAGO [45] * |
| <b>Waste</b>    |                                                                                                                                                                                                                                                               |             |
| Waste treatment | * see licensed facilities                                                                                                                                                                                                                                     |             |

| <b>Environment</b>                                                                                                                                                                                                                                                                              |                                                                                                                                                          |                              |
|-------------------------------------------------------------------------------------------------------------------------------------------------------------------------------------------------------------------------------------------------------------------------------------------------|----------------------------------------------------------------------------------------------------------------------------------------------------------|------------------------------|
| <b>Liveable Environment</b>                                                                                                                                                                                                                                                                     |                                                                                                                                                          |                              |
| <b>Liveability</b>                                                                                                                                                                                                                                                                              |                                                                                                                                                          |                              |
| Various measures:<br>EPAV summaries for LGAs                                                                                                                                                                                                                                                    | EPAV Data Analytic Product: For consideration as a set of measures:                                                                                      | (EPAV dataset)               |
| RMIT liveability reports:                                                                                                                                                                                                                                                                       | RMIT liveability reports: For consideration as a set of measures.                                                                                        | Arundel, <i>et al.</i> [46]* |
| Various measures are available relating to: <ul style="list-style-type: none"> <li>• Walkability</li> <li>• Public Open Space</li> <li>• Public Transport</li> <li>• Housing Affordability</li> <li>• Employment</li> <li>• Social infrastructure</li> <li>• Food</li> <li>• Alcohol</li> </ul> | Please see the original report for specific definitions.<br><br>Note: some of these measures are restated in the list below because of their importance. |                              |
| <b>Climate</b>                                                                                                                                                                                                                                                                                  |                                                                                                                                                          |                              |
| Urban heat island effect                                                                                                                                                                                                                                                                        | Average maximum daily summer temperature >35°C in urban areas                                                                                            | Navi, <i>et al.</i> [47]     |



|                                   |                                                                                                                                                                                                                                                                                                                                                                                                                                                                         |                                                                    |
|-----------------------------------|-------------------------------------------------------------------------------------------------------------------------------------------------------------------------------------------------------------------------------------------------------------------------------------------------------------------------------------------------------------------------------------------------------------------------------------------------------------------------|--------------------------------------------------------------------|
|                                   | Heat wave: Two or more consecutive days with a daily maximum temperature at or above 37°C                                                                                                                                                                                                                                                                                                                                                                               | Turner, Connell and Tong [20]                                      |
| Rainfall                          | 24-hour 0901 – 0900 daily rainfall in mm, collected using a standard 203 mm rain gauge                                                                                                                                                                                                                                                                                                                                                                                  | BOM [48]*                                                          |
| <b>Access to green space</b>      |                                                                                                                                                                                                                                                                                                                                                                                                                                                                         |                                                                    |
| Public Open Space access          | Having access to a park of at least 1.5 ha within 400 m                                                                                                                                                                                                                                                                                                                                                                                                                 | Arundel, Lowe, Hooper, Roberts, Rozek, Higgs and Giles-Corti [46]* |
|                                   | Park availability: number of parks whose boundaries intersected the boundary of each census tract, total amount of park space in each census tract, park features using CPAT                                                                                                                                                                                                                                                                                            | Vaughan, <i>et al.</i> [49]*                                       |
|                                   | Greenness: Normalized Difference Vegetation Index (NDVI) from Landsat. NDVI provides an indication of the presence and condition of green vegetation with values typically ranging from -1 to +1. Values of -1 generally represent water, while values close to zero (-0.1 to 0.1) correspond to bare surfaces such as rock, sand, rooftops and roads. Higher values (0.2 to 0.4) represent grassland or bush land and values of +1 represent healthy green vegetation. | Pereira, <i>et al.</i> [50]*                                       |
|                                   | Greenness: High resolution SPOT satellite imagery (5 × 5 m grid), using the NDVI                                                                                                                                                                                                                                                                                                                                                                                        | Lakes, Brückner and Krämer [41]*                                   |
| <b>Access to Public Transport</b> |                                                                                                                                                                                                                                                                                                                                                                                                                                                                         |                                                                    |
| PT access                         | Access within 400m of a public transport stop with a 30 minute or wait time or less                                                                                                                                                                                                                                                                                                                                                                                     | Arundel, Lowe, Hooper, Roberts, Rozek, Higgs and Giles-Corti [46]* |
|                                   | Network distance to the nearest bus stop with Four categories:<br>0–200 m,<br>200–500 m,<br>600– 900 m and<br>10 km or more                                                                                                                                                                                                                                                                                                                                             | Wilson, <i>et al.</i> [51]                                         |
| Commuting                         | Journey to work by mode                                                                                                                                                                                                                                                                                                                                                                                                                                                 | (ABS Census of Population and Housing)*                            |
| <b>Walkability</b>                |                                                                                                                                                                                                                                                                                                                                                                                                                                                                         |                                                                    |

|                          |                                                                                                                                       |                                                                          |
|--------------------------|---------------------------------------------------------------------------------------------------------------------------------------|--------------------------------------------------------------------------|
| Walkability measure      | Composite measure combining access to destinations, population density and street connectivity                                        | Arundel, Lowe, Hooper, Roberts, Rozek, Higgs and Giles-Corti [46]*       |
| Access to destinations   | Degree to which there is a mix of land use within a 1 km radius, divided into quintiles – where quintile 1 represents the least dense | Wilson, Giles-Corti and Turrell [51] *                                   |
|                          | Location of childcare centres/nursing homes                                                                                           | Walter, Schneider-Futschik and Irving [28], Claudio, <i>et al.</i> [52]* |
|                          | Access to social infrastructure                                                                                                       | Davern, <i>et al.</i> [53]*                                              |
| Population density       | Dwelling density: dwellings per hectare                                                                                               | Arundel, Lowe, Hooper, Roberts, Rozek, Higgs and Giles-Corti [46]*       |
| Street/road connectivity | Number of 3 or 4-way streets within a 1.6km radius of a residential home                                                              | Arundel, Lowe, Hooper, Roberts, Rozek, Higgs and Giles-Corti [46]*       |
|                          | Count of four-way or more intersections within a 1 km radius, divided into five quintiles; quintile 5 represents the most connected   | Wilson, Giles-Corti and Turrell [51] *                                   |
| <b>Housing</b>           |                                                                                                                                       |                                                                          |
| Affordable housing       | Households in the bottom 40% of income that spend 30% of their total income on housing                                                | Arundel, Lowe, Hooper, Roberts, Rozek, Higgs and Giles-Corti [46]*       |
| <b>Employment</b>        |                                                                                                                                       |                                                                          |
| Employment               | Percentage of employed people living in an SA2 and working in a broader SA3                                                           | Arundel, Lowe, Hooper, Roberts, Rozek, Higgs and Giles-Corti [46]*       |
| <b>Food Environment</b>  |                                                                                                                                       |                                                                          |
| Supermarket access       | Percentage of residences within 1 km of a supermarket                                                                                 | Arundel, Lowe, Hooper, Roberts, Rozek, Higgs and Giles-Corti [46]*       |

|                            |                                                                                                  |                                                                    |
|----------------------------|--------------------------------------------------------------------------------------------------|--------------------------------------------------------------------|
| Health food ratio          | Percentage of health food outlets as a proportion of all food outlets                            | Arundel, Lowe, Hooper, Roberts, Rozek, Higgs and Giles-Corti [46]* |
| <b>Alcohol Environment</b> |                                                                                                  |                                                                    |
| Alcohol access             | Percentage of residences without access to off-license outlets (bottle-shops, take-away alcohol) | Arundel, Lowe, Hooper, Roberts, Rozek, Higgs and Giles-Corti [46]* |

| Health / Epidemiology              |                                                                                                                                                                                                                                                                                                                                                                                                                                                                                                      |                                                                   |
|------------------------------------|------------------------------------------------------------------------------------------------------------------------------------------------------------------------------------------------------------------------------------------------------------------------------------------------------------------------------------------------------------------------------------------------------------------------------------------------------------------------------------------------------|-------------------------------------------------------------------|
| Measures                           | Measure definitions                                                                                                                                                                                                                                                                                                                                                                                                                                                                                  | Reference                                                         |
| <b>Respiratory illness</b>         |                                                                                                                                                                                                                                                                                                                                                                                                                                                                                                      |                                                                   |
| Self-reported asthma               | 270,000 inhabitants of Munster, Germany using the ISAAC <i>International Study of Asthma and Allergies in Childhood</i> questionnaire: '(1) Have you had wheezing or whistling in the chest in the last 12 months? (Yes/No); (2) A positive response to at least one of the first three video scenes regarding wheezing during the last year; and (3) In the past 12 months, have you had a problem with sneezing, or a runny, or a blocked nose when you did not have a cold or the flu?' (Yes/No). | Duhme, Weiland, Keil, Kraemer, Schmid, Stender and Chambless [27] |
| Asthma hospitalisations            | Hospitalization rates per 10,000 residents using hospital discharge data for all New York state zip codes                                                                                                                                                                                                                                                                                                                                                                                            | Claudio, Tulton, Doucette and Landrigan [52]*                     |
| Asthma cases                       | (somewhat ambiguous) geo-referenced ambulance attendance data                                                                                                                                                                                                                                                                                                                                                                                                                                        | Turner, Connell and Tong [20]                                     |
| COPD                               | Patients diagnose with COPD coded as R91 (chronicbronchitis) or R95 (pulmonary emphysema/COPD) according to the International Classification of Primary Care.                                                                                                                                                                                                                                                                                                                                        | Smit, <i>et al.</i> [54]                                          |
| <b>Mortality</b>                   |                                                                                                                                                                                                                                                                                                                                                                                                                                                                                                      |                                                                   |
| All-cause non-accidental mortality | Daily mortality of people of a defined area coded using the International Classification of Diseases Revision 10 (IDC-10) as non-accidental mortality (A00 – R99)                                                                                                                                                                                                                                                                                                                                    | Navi, Pisaniello, Hansen and Nitschke [47]                        |
|                                    | Re IDC-11, may be defined as the daily mortality of people of a defined area coded as all of 1A00 – MH2Y                                                                                                                                                                                                                                                                                                                                                                                             | See WHO [55]                                                      |

|                                  |                                                                                                                                                                                                                                                                                                                                   |                                                                        |
|----------------------------------|-----------------------------------------------------------------------------------------------------------------------------------------------------------------------------------------------------------------------------------------------------------------------------------------------------------------------------------|------------------------------------------------------------------------|
| <b>Non-communicable diseases</b> |                                                                                                                                                                                                                                                                                                                                   |                                                                        |
| Overweight and obesity           | Self-reported height and weight obtained from the Health and Wellbeing Survey to calculate BMI. Participants aged 18 years and over were classified as <i>obese</i> if their BMI (weight (kg)/height (meters) <sup>2</sup> ) exceeded 30, and as <i>overweight-or-obese</i> if the BMI was above 25.                              | Pereira, Christian, Foster, Boruff, Bull, Knuiman and Giles-Corti [50] |
|                                  | Self-reported height and weight participants “how tall are you without shoes on?” and were able to respond in either centimetres or feet and inches; and “how much do you weigh without your clothes or shoes on?”. BMI was calculated as weight in kilograms, divided by height in meters squared.                               | Rachele, <i>et al.</i> [56]*                                           |
| Diabetes Type 2                  | Self-reported: “Have you ever been told by a doctor or nurse that you have any of the long-term health conditions listed below?” Type 2 diabetes and heart/coronary disease were two of eight listed conditions.                                                                                                                  | Rachele, <i>et al.</i> [57]*                                           |
| Lung cancer rates                | Age-adjusted lung cancer incidence between 1992 and 2007 at county level from 13 counties via the Surveillance, Epidemiology, and End Results (SEER) Program of the National Cancer Institute (NCI)                                                                                                                               | Luo and Hendryx [24], Luo, Hendryx and Ducatman [25]                   |
| Self-reported health             | Survey to 11,307 households: “In general, would you say your health is...?” Response options were: excellent, very good, good, fair, and poor. Census collection district level.                                                                                                                                                  | Badland, <i>et al.</i> [58]*                                           |
|                                  | SF-36: 36-item short-form health survey.                                                                                                                                                                                                                                                                                          | c.f. Richardson, <i>et al.</i> [59], Ware, <i>et al.</i> [60]          |
| Self-reported mental health      | The Index includes subjective ratings of satisfaction across seven domains of their personal lives: standard of living, health, achievements in life, community connection, personal relationships, safety, and future security. Has been used in Australia since 2001 with a large sample of established normative data results. | Cummins, <i>et al.</i> [61], Davern [62] *                             |
| Low birth weight (full term)     | Babies who are born weighing less than 2,500 grams                                                                                                                                                                                                                                                                                | WHO [63]                                                               |
|                                  | Birthweight of 196,978 babies born in Sao Paulo in 1997 from the Birth Information System (SINASC) of the Ministry of Health (Brazil)                                                                                                                                                                                             | Gouveia, Bremner and Novaes [15]                                       |
| <b>Behavioural Epidemiology</b>  |                                                                                                                                                                                                                                                                                                                                   |                                                                        |
| Physical activity                | Three questions from the Active Australia Survey to categorise participants’ walking, moderate activity, and vigorous activity. E.g. walking, was defined as “continuous walking 10 minutes in the previous week for recreation, exercise, or                                                                                     | Turrell, <i>et al.</i> [64]*                                           |

|                |                                                                                                                                                                                                                                                                                                                                                                                                                                                                                                                                                                                                           |                                                                    |
|----------------|-----------------------------------------------------------------------------------------------------------------------------------------------------------------------------------------------------------------------------------------------------------------------------------------------------------------------------------------------------------------------------------------------------------------------------------------------------------------------------------------------------------------------------------------------------------------------------------------------------------|--------------------------------------------------------------------|
|                | to get to or from places'' and categorised as none/negligible (<30 minutes), very low (>30 to <90 minutes), low (>90 to <150 minutes), moderate (>150 to <300 minutes) and high (>300 minutes)                                                                                                                                                                                                                                                                                                                                                                                                            |                                                                    |
|                | Modified question from the Australian National Heart Foundation Risk Factor Prevalence Study (National Heart Foundation of Australia, 1989). Participants were asked, "Which one of the following best describes your cigarette smoking" and the following response categories were provided: I smoke daily, I smoke occasionally, I don't smoke now but used to, and I have never smoked. For analysis, smoking status was re-coded into [1] smoker (I smoke daily), and [0] non-smoker (I smoke occasionally, I don't smoke now but used to, and I have never smoked). Census collection district level | Rachele, <i>et al.</i> [65]*                                       |
| Smoking status | Active smoking, passive smoking, no smoking                                                                                                                                                                                                                                                                                                                                                                                                                                                                                                                                                               | Duhme, Weiland, Keil, Kraemer, Schmid, Stender and Chambless [27]* |

| Disadvantage (using demographics) |                                                                                                      |                                                         |
|-----------------------------------|------------------------------------------------------------------------------------------------------|---------------------------------------------------------|
| Measures                          | Definitions                                                                                          | Reference                                               |
| Age                               | year age categories:<1, 1–4, 5–9, 10–14, 15–19, 20–24, 25–34, 35–44, 45–54, 55–64, 65–74, 75–84, 85+ | Barnes, Chatterton and Longhurst [16]                   |
| Vulnerable age                    | People less than 15 or older than 65                                                                 | Gunn, Greenham, Davern, Mavoa, Taylor and Bannister [2] |
|                                   | Percentage less than 18 and more than 65                                                             | Spina [5]                                               |
|                                   | Less than 17 years                                                                                   | Claudio, Tulton, Doucette and Landrigan [52]*           |
|                                   | Percentage of people over 65                                                                         | Navi, Pisaniello, Hansen and Nitschke [47]              |
|                                   | Poor children: the share of children under 18 years old residing in households which                 | Tolhurst, Goodhue, DeMars and Zhang [43]                |

|                      |                                                                                                                                                                                             |                                                                                                                                                                                                                                                          |
|----------------------|---------------------------------------------------------------------------------------------------------------------------------------------------------------------------------------------|----------------------------------------------------------------------------------------------------------------------------------------------------------------------------------------------------------------------------------------------------------|
|                      | received Supplemental Security Income (SSI), cash public assistance income, or Food Stamps/SNAP in the past 12 months (US Census <i>American Community Survey</i> data) at (US) block level |                                                                                                                                                                                                                                                          |
| Gender               | Percentage male or female                                                                                                                                                                   | Spina [5], Luo, Hendryx and Ducatman [25]. Also Badland, Turrell and Giles-Corti [58], Turrell, Haynes, Burton, Giles-Corti, Oldenburg, Wilson, Giskes and Brown [64], Rachele, Wood, Nathan, Giskes and Turrell [65], Kamruzzaman, <i>et al.</i> [66] * |
| SES status           | Index of Relative Socio-economic Disadvantage (IRSD)                                                                                                                                        | ABS [67] cited in for example Chakraborty and Green [23],[68] and Gunn, Greenham, Davern, Mavoa, Taylor and Bannister [2]                                                                                                                                |
|                      | Percentage of low-income families                                                                                                                                                           | Navi, Pisaniello, Hansen and Nitschke [47]                                                                                                                                                                                                               |
| Language proficiency | 25% or more of the residents are not fluent in the English language                                                                                                                         | Gunn, Greenham, Davern, Mavoa, Taylor and Bannister [2]                                                                                                                                                                                                  |
| Ethnicity            | Proportion of SA1 respondents self-reporting as Indigenous in the Australian ABS Census of Population and Housing                                                                           | Chakraborty and Green [23],[68]                                                                                                                                                                                                                          |
|                      | Percentage of the population belonging to a minority group (a 'deprivation' proxy)                                                                                                          | Tanzer, Malings, Hauryliuk, Subramanian and Presto [12], Greife, <i>et al.</i> [69]                                                                                                                                                                      |
|                      | Non-Hispanic white, Non-Hispanic Black, Hispanic and other. Plus 'Racial isolation'; measuring non-Hispanic black groups' exposure to itself compared to other groups                       | Bravo, Anthopolos, Bell and Miranda [14]                                                                                                                                                                                                                 |

|                       |                                                                                                                                                                                                                                                                                                   |                                                                          |
|-----------------------|---------------------------------------------------------------------------------------------------------------------------------------------------------------------------------------------------------------------------------------------------------------------------------------------------|--------------------------------------------------------------------------|
|                       | % Hispanic residents, % non-Hispanic Black residents in area covered by community water system                                                                                                                                                                                                    | Schaider, Swetschinski, Campbell and Rudel [34]                          |
|                       | Census tract percentages of White, non-white and Hispanic white residents. Data from the American Community Survey; ACS                                                                                                                                                                           | Vaughan, Kaczynski, Wilhelm Stanis, Besenyi, Bergstrom and Heinrich [49] |
|                       | Percentage Hispanic (US Census <i>American Community Survey</i> data) at block level                                                                                                                                                                                                              | Tolhurst, Goodhue, DeMars and Zhang [43]                                 |
|                       | Percentage Black or Hispanic by county                                                                                                                                                                                                                                                            | Spina [5]                                                                |
| Education             | No high school, high school, college                                                                                                                                                                                                                                                              | Bravo, Anthopolos, Bell and Miranda [14], Luo, Hendryx and Ducatman [25] |
|                       | Up to year 12<br>Diploma/certificate<br>Graduate and over                                                                                                                                                                                                                                         | Kamruzzaman, Shatu, Hine and Turrell [66]*                               |
|                       | Self-reported via survey into 1 of 4 categories: (1) bachelor degree or higher (including postgraduate diploma, master's degree, or doctorate), (2) diploma (associate or undergraduate), (3) vocational (trade or business certificate or apprenticeship), and (4) no postschool qualifications. | Rachele, Giles-Corti and Turrell [57]*                                   |
| School performance    | Percentage of students in a school who did not meet the Michigan Educational Assessment Program score standard                                                                                                                                                                                    | Kweon, Mohai, Lee and Sametshaw [8]                                      |
| School characteristic | Percent of free lunch as a proxy for school socio-economic status                                                                                                                                                                                                                                 | Kweon, Mohai, Lee and Sametshaw [8]                                      |
| Urbanicity            | Categorization of tracts into one of four categories based on commuting flows: metropolitan; micropolitan; small town; and rural.                                                                                                                                                                 | Bravo, Anthopolos, Bell and Miranda [14]                                 |
| Income                | Percentage of the population living below poverty line (deprivation)                                                                                                                                                                                                                              | Tanzer, Malings, Hauryliuk, Subramanian and Presto [12]                  |
|                       | Percentage of households living in poverty (deprivation) based on the 'Breadline Britain Index'                                                                                                                                                                                                   | Barnes, Chatterton and Longhurst [16]                                    |
|                       | Schools where X % of students are eligible for free and reduced-cost meals                                                                                                                                                                                                                        | Collins, <i>et al.</i> [70]                                              |
|                       | Vulnerable income: the percentage of household incomes in the lowest 3 deciles for Victoria corresponding to between \$A400 (\$A20,800 annually) and \$A799 per week (\$A41,599 annually).                                                                                                        | Gunn, Greenham, Davern, Mavoa, Taylor and Bannister [2]                  |

|                            |                                                                                                                                                                                                                                                                                 |                                                                                                                                                                          |
|----------------------------|---------------------------------------------------------------------------------------------------------------------------------------------------------------------------------------------------------------------------------------------------------------------------------|--------------------------------------------------------------------------------------------------------------------------------------------------------------------------|
|                            | Not in poverty, in poverty, using US American Community Survey (ACS) census data defined levels                                                                                                                                                                                 | Bravo, Anthopolos, Bell and Miranda [14], Luo, Hendryx and Ducatman [25], Schaidler, Swetschinski, Campbell and Rudel [34], Greife, Stretesky, Shelley and Pogrebin [69] |
|                            | Block groups (US) with annual median household levels below US\$54,357 (the county average) as measured by the 2012 to 2016 American Community Survey (ACS)                                                                                                                     | Zhao, Gladson and Cromar [6]                                                                                                                                             |
|                            | Self-estimate of total pre-tax annual household income using a single question comprising six categories: (1) AU \$130,000; (2) AU \$129,999 - \$72,800; (3) AU \$72,799 - \$52,000, (4) AU \$51,999 - \$26,000, (5) AU \$25,999 and "Don't know" / "Don't want to answer this" | Rachele, Giles-Corti and Turrell [57]*                                                                                                                                   |
|                            | Household income in dollars                                                                                                                                                                                                                                                     | Claudio, Tulton, Doucette and Landrigan [52]                                                                                                                             |
| Employment                 | Percentage >16yo who are employed, unemployed, using US census data                                                                                                                                                                                                             | Bravo, Anthopolos, Bell and Miranda [14]                                                                                                                                 |
|                            | Part time or Full-time                                                                                                                                                                                                                                                          | Kamruzzaman, Shatu, Hine and Turrell [66]*                                                                                                                               |
|                            | Proportion unemployed (US county level)                                                                                                                                                                                                                                         | Luo, Hendryx and Ducatman [25]                                                                                                                                           |
| Job accessibility          | Mobility index defining the number of jobs available within a set commuting time for census block level                                                                                                                                                                         | Zhao, Gladson and Cromar [6]                                                                                                                                             |
| Car ownership              | Proportion of households with availability of 0, 1, 2, 3, and 3+ cars/vans.                                                                                                                                                                                                     | Barnes, Chatterton and Longhurst [16]                                                                                                                                    |
| Marital status / isolation | Living alone, no children<br>Single parent with $\geq 1$ children<br>Single and living with friends/relatives<br>Couple living with no children<br>Couple living with 1+ children<br>Other                                                                                      | Kamruzzaman, Shatu, Hine and Turrell [66]*                                                                                                                               |



|                    |                                                                                                                                                                                                                                                   |                                                                                 |
|--------------------|---------------------------------------------------------------------------------------------------------------------------------------------------------------------------------------------------------------------------------------------------|---------------------------------------------------------------------------------|
|                    | Numbers of people living alone, one-parent families with dependent children, and couples with no dependent children                                                                                                                               | Navi, Pisaniello, Hansen and Nitschke [47]                                      |
| Composite measures | Australian SEIFA IRSD, IER and IEO for 8781 Statistical Area Level 1 (SA1)                                                                                                                                                                        | Gunn, Greenham, Davern, Mavoa, Taylor and Bannister [2]                         |
|                    | Australian SEIFA IRSD for 200 Census collection districts                                                                                                                                                                                         | Rachele, Giles-Corti and Turrell [57]*                                          |
|                    | IRSD for 200 ABS census collection districts                                                                                                                                                                                                      | Turrell, Haynes, Burton, Giles-Corti, Oldenburg, Wilson, Giskes and Brown [64]* |
|                    | Carstairs Score at Continuous Areas Through Time (CATT) level                                                                                                                                                                                     | Richardson, Shortt and Mitchell [1]                                             |
|                    | Scottish index of Multiple Deprivation                                                                                                                                                                                                            | Richardson, Shortt and Mitchell [1]                                             |
|                    | Vulnerability to climate change: derived from 39 different variables – see reference                                                                                                                                                              | Wilson, <i>et al.</i> [71]                                                      |
|                    | Social disorganization index                                                                                                                                                                                                                      | Spina [5]                                                                       |
|                    | Social Development Index, the <i>Berlin Senate Department of Urban Development</i> , which contains 12 social status and social development figures assessed at block-level, resulting in: high-; medium-; low-; and very-low-social development. | Lakes, Brückner and Krämer [41]                                                 |

## Organisational Procedures

| Measures             | Measure definition                                                                                                                                                                                                                  | Reference                            |
|----------------------|-------------------------------------------------------------------------------------------------------------------------------------------------------------------------------------------------------------------------------------|--------------------------------------|
| <b>Inspections</b>   |                                                                                                                                                                                                                                     |                                      |
|                      | State patterns of inspections of the Resource Conservation and Recovery Act (RCRA) nationwide from 2002 to 2011 from the US EPA's Integrated Database for Enforcement Analysis (factored against county-years' minority and income) | Spina [5], Spina, <i>et al.</i> [72] |
| <b>Infringements</b> |                                                                                                                                                                                                                                     |                                      |
|                      | Criminal prosecutions (conviction or guilty pleas) in Ireland from 2004 to 2014 from I-EPA Prosecutions website, 12 categories of fine amounts                                                                                      | Lynch, <i>et al.</i> [73]            |

|                              |                                                                                                                                                                  |                                                                      |
|------------------------------|------------------------------------------------------------------------------------------------------------------------------------------------------------------|----------------------------------------------------------------------|
|                              | Criminal prosecutions of environmental corporate crimes that occurred in the United States between 2005 and 2010 (n=245) via a FOI Act request from the (US) EPA | Greife, Stretesky, Shelley and Pogrebin [69]                         |
| <b>Abatement</b>             |                                                                                                                                                                  |                                                                      |
| Noise                        | Spatial distribution of noise barriers                                                                                                                           | Potvin, <i>et al.</i> [74], Potvin [75], Carrier, <i>et al.</i> [76] |
| <b>Government investment</b> |                                                                                                                                                                  |                                                                      |
|                              | Funding for, and selection of sites for urban regeneration                                                                                                       | Ruá, <i>et al.</i> [77]*                                             |
|                              | Government investment in community engagement                                                                                                                    | Bond [78]*                                                           |

## References

- Richardson, E.A.; Shortt, N.K.; Mitchell, R.J. The mechanism behind environmental inequality in Scotland: Which came first, the deprivation or the landfill? *Environ. Plan. A* **2010**, *42*, 223–240.
- Gunn, L.D.; Greenham, B.; Davern, M.; Mavoa, S.; Taylor, E.J.; Bannister, M. Environmental justice in Australia: Measuring the relationship between industrial odour exposure and community disadvantage. In *Community Quality-of-Life indicators: Best Cases VII*; Springer: Berlin/Heidelberg, Germany, 2017; pp. 113–133.
- Chakraborty, J.; Armstrong, M.P. Exploring the Use of Buffer Analysis for the Identification of Impacted Areas in Environmental Equity Assessment. *Cartogr. Geogr. Inf. Syst.* **1997**, *24*, 145–157.
- Morrison, S.; Fordyce, F.; Scott, E.M. An initial assessment of spatial relationships between respiratory cases, soil metal content, air quality and deprivation indicators in Glasgow, Scotland, UK: Relevance to the environmental justice agenda. *Environ. Geochem. Health* **2014**, *36*, 319–332.
- Spina, F. Environmental justice and patterns of state inspections. *Soc. Sci. Q.* **2015**, *96*, 417–429.
- Zhao, J.; Gladson, L.; Cromar, K. A novel environmental justice indicator for managing local air pollution. *Int. J. Environ. Res. Public Health* **2018**, *15*, 1260.
- Zwickl, K. The demographics of fracking: A spatial analysis for four US states. *Ecol. Econ.* **2019**, *161*, 202–215.
- Kweon, B.-S.; Mohai, P.; Lee, S.; Sametshaw, A.M. Proximity of public schools to major highways and industrial facilities, and students' school performance and health hazards. *Environ. Plan. B Urban Anal. City Sci.* **2018**, *45*, 312–329.
- WHO. *Ambient (Outdoor) Air Quality and Health*; The World Health Organization: Geneva, Switzerland, 2015.
- Gaither, C., J.; Afrin, S.; Garcia-Menendez, F.; Odman, M.T.; Huang, R.; Goodrick, S.; Ricardo da Silva, A. African American Exposure to Prescribed Fire Smoke in Georgia, USA. *Int. J. Environ. Res. Public Health* **2019**, *16*, 3079.
- Morelli, X.; Gabet, S.; Rieux, C.; Bouscasse, H.; Mathy, S.; Slama, R. Which decreases in air pollution should be targeted to bring health and economic benefits and improve environmental justice? *Environ. Int.* **2019**, *129*, 538–550.
- Tanzer, R.; Malings, C.; Hauryliuk, A.; Subramanian, R.; Presto, A.A. Demonstration of a Low-Cost Multi-Pollutant Network to Quantify Intra-Urban Spatial Variations in Air Pollutant Source Impacts and to Evaluate Environmental Justice. *Int. J. Environ. Res. Public Health* **2019**, *16*, 2523.
- Hu, X.; Waller, L.A.; Lyapustin, A.; Wang, Y.; Al-Hamdan, M.Z.; Crosson, W.L.; Estes Jr, M.G.; Estes, S.M.; Quattrochi, D.A.; Puttaswamy, S.J. Estimating ground-level PM<sub>2.5</sub> concentrations in the Southeastern United States using MAIAC AOD retrievals and a two-stage model. *Remote Sens. Environ.* **2014**, *140*, 220–232.
- Bravo, M.A.; Anthopolos, R.; Bell, M.L.; Miranda, M.L. Racial isolation and exposure to airborne particulate matter and ozone in understudied US populations: Environmental justice applications of downscaled numerical model output. *Environ. Int.* **2016**, *92*, 247–255.
- Gouveia, N.; Bremner, S.; Novaes, H. Association between ambient air pollution and birth weight in São Paulo, Brazil. *J. Epidemiol. Community Health* **2004**, *58*, 11–17.
- Barnes, J.H.; Chatterton, T.J.; Longhurst, J.W. Emissions vs exposure: Increasing injustice from road traffic-related air pollution in the United Kingdom. *Transp. Res. Part D Transp. Environ.* **2019**, *73*, 56–66.
- Guo, H.; Wang, T.; Blake, D.; Simpson, I.; Kwok, Y.; Li, Y. Regional and local contributions to ambient non-methane volatile organic compounds at a polluted rural/coastal site in Pearl River Delta, China. *Atmos. Environ.* **2006**, *40*, 2345–2359.
- Zielinska, B.; Fujita, E.; Ollison, W.; Campbell, D.; Sagebiel, J. Quantification of personal exposure concentrations to gasoline vehicle emissions in high-end exposure microenvironments: Effects of fuel and season. *J. Air Waste Manag. Assoc.* **2012**, *62*, 1346–1357.
- Malmqvist, E.; Rignell-Hydbom, A.; Tinnerberg, H.; Björk, J.; Stroh, E.; Jakobsson, K.; Rittner, R.; Rylander, L. Maternal exposure to air pollution and birth outcomes. *Environ. Health Perspect.* **2011**, *119*, 553–558.
- Turner, L.R.; Connell, D.; Tong, S. The effect of heat waves on ambulance attendances in Brisbane, Australia. *Prehospital Disaster Med.* **2013**, *28*, 482–487.
- Haberle, S.G.; Bowman, D.M.; Newnham, R.M.; Johnston, F.H.; Beggs, P.J.; Buters, J.; Campbell, B.; Erbas, B.; Godwin, I.; Green, B.J. The macroecology of airborne pollen in Australian and New Zealand urban areas. *PLoS ONE* **2014**, *9*, e97925.
- Yoon, D.; Kang, J.; Park, J. Exploring environmental inequity in South Korea: An analysis of the distribution of toxic release inventory (TRI) facilities and toxic releases. *Sustainability* **2017**, *9*, 1886.
- Chakraborty, J.; Green, D. Australia's first national level quantitative environmental justice assessment of industrial air pollution. *Environ. Res. Lett.* **2014**, *9*, 1.
- Luo, J.; Hendryx, M. Environmental Carcinogen Releases and Lung Cancer Mortality in Rural-Urban Areas of the United States. *J. Rural Health* **2011**, *27*, 342–349.
- Luo, J.; Hendryx, M.; Ducatman, A. Association between six environmental chemicals and lung cancer incidence in the United States. *J. Environ. Public Health* **2011**, *2011*, 463701.
- Darwish, T.; Bakar, K.A. Traffic density estimation in vehicular ad hoc networks: A review. *Ad Hoc Netw.* **2015**, *24*, 337–351.
- Duhme, H.; Weiland, S.K.; Keil, U.; Kraemer, B.; Schmid, M.; Stender, M.; Chambless, L. The association between self-reported symptoms of asthma and allergic rhinitis and self-reported traffic density on street of residence in adolescents. *Epidemiology* **1996**, *7*, 578–582.
- Walter, C.; Schneider-Futschik, E.; Irving, L. Traffic pollution near childcare centres in Melbourne. *Aust. N. Z. J. Public Health* **2019**, *43*, 410–412.
- Wiseman, J.; McLeod, J.; Zubrick, S.R. Promoting mental health and well-being: Integrating individual, organisational and community-level indicators. *Health Promot. J. Aust.* **2007**, *18*, 198–207.
- Rogalsky, D.K.; Mendola, P.; Metts, T.A.; Martin, W.J. Estimating the number of low-income americans exposed to household air pollution from burning solid fuels. *Environ. Health Perspect.* **2014**, *122*, 806–810.
- CEHTP. *Agricultural Pesticide Use Near Public Schools in California*; California Department of Public Health and the Public Health Institute: San Francisco, CA, USA, 2014.
- Rüttenauer, T. Neighbours matter: A nation-wide small-area assessment of environmental inequality in Germany. *Soc. Sci. Res.* **2018**, *70*, 198–211.
- EPAV. Beach Report–Water Quality Forecast. Available online: <https://yarraandbay.vic.gov.au/beach-report> (accessed on 22 September 2019).
- Schaider, L.A.; Swetschinski, L.; Campbell, C.; Rudel, R.A. Environmental justice and drinking water quality: Are there socioeconomic disparities in nitrate levels in U.S. drinking water? *Environ. Health A Glob. Access Sci. Source* **2019**, *18*, 1–15. <https://doi.org/10.1186/s12940-018-0442-6>.
- CES. State of the Environment Part 4, Coasts Estuaries & The Sea. In *Commissioner for Environmental Sustainability*; Victorian Government: Melbourne, Australia, 2008.
- Boyd, G.R.; Palmeri, J.M.; Zhang, S.; Grimm, D.A. Pharmaceuticals and personal care products (PPCPs) and endocrine disrupting chemicals (EDCs) in stormwater canals and Bayou St. John in New Orleans, Louisiana, USA. *Sci. Total Environ.* **2004**, *333*, 137–148.
- Fielding, J.L. Flood risk and inequalities between ethnic groups in the floodplains of England and Wales. *Disasters* **2018**, *42*, 101–123.
- Chakraborty, J.; Collins, T.W.; Grineski, S.E. Exploring the environmental justice implications of Hurricane Harvey flooding in Greater Houston, Texas. *Am. J. Public Health* **2019**, *109*, 244–250.
- Havard, S.; Reich, B.J.; Bean, K.; Chaix, B. Social inequalities in residential exposure to road traffic noise: An environmental justice analysis based on the RECORD Cohort Study. *Occup. Environ. Med.* **2011**, *68*, 366–374.
- Sobotta, R.R.; Campbell, H.E.; Owens, B.J. Aviation noise and environmental justice: The barrio barrier. *J. Reg. Sci.* **2007**, *47*, 125–154.
- Lakes, T.; Brückner, M.; Krämer, A. Development of an environmental justice index to determine socio-economic disparities of noise pollution and green space in residential areas in Berlin. *J. Environ. Plan. Manag.* **2014**, *57*, 538–556.
- Richardson, M.J.; Madrigal, D.S.; Wilkie, A.; Wong, M.; Roberts, E. Environmental Health Tracking Improves Pesticide Use Data to Enable Research and Inform Public Health Actions in California. *J. Public Health Manag. Pract.* **2017**, *23*, S97–S104.
- Tolhurst, T.; Goodhue, R.; DeMars, C.; Zhang, M. Environmental Justice and Self-Regulation of Pesticide Applications: Evidence from California. In Proceedings of Agricultural & Applied Economics Association Annual Meeting, Atlanta, GA, USA, 21–23 July 2019.
- Blue Environment. *Hazardous Waste in Australia 2017*; Department of the Environment and Energy: Melbourne, Australia, 2017.
- VAGO. *Recovering and Reprocessing Resources from Waste*; Victorian Government: Melbourne, Australia, 2019.
- Arundel, J.; Lowe, M.; Hooper, P.; Roberts, R.; Rozek, J.; Higgs, C.; Giles-Corti, B. *Creating Liveable Cities in Australia: Mapping Urban Policy Implementation and Evidence-Based National Liveability Indicators*; Centre for Urban Research (CUR): Melbourne, Australia, 2017.
- Navi, M.; Pisaniello, D.; Hansen, A.; Nitschke, M. Potential health outcome and vulnerability indicators of climate change for Australia: Evidence for policy development. *Aust. J. Public Adm.* **2017**, *76*, 160–175.
- BOM. Observation of Rainfall. Available online: <http://www.bom.gov.au/climate/cdo/about/rain-measure.shtml> (accessed on 22 September 2019).
- Vaughan, K.B.; Kaczynski, A.T.; Wilhelm Stanis, S.A.; Besenyi, G.M.; Bergstrom, R.; Heinrich, K.M. Exploring the distribution of park availability, features, and quality across Kansas City, Missouri by income and race/ethnicity: An environmental justice investigation. *Ann. Behav. Med.* **2013**, *45*, S28–S38.
- Pereira, G.; Christian, H.; Foster, S.; Boruff, B.J.; Bull, F.; Knuiman, M.; Giles-Corti, B. The association between neighborhood greenness and weight status: An observational study in Perth Western Australia. *Environ. Health* **2013**, *12*, 49.
- Wilson, L.-A.; Giles-Corti, B.; Turrell, G. The association between objectively measured neighbourhood features and walking for transport in mid-aged adults. *Local Environ.* **2012**, *17*, 131–146.
- Claudio, L.; Tulton, L.; Doucette, J.; Landrigan, P.J. Socioeconomic factors and asthma hospitalization rates in New York City. *J. Asthma* **1999**, *36*, 343–350.

53. Davern, M.; Gunn, L.; Whitzman, C.; Higgs, C.; Giles-Corti, B.; Simons, K.; Villanueva, K.; Mavoa, S.; Roberts, R.; Badland, H. Using spatial measures to test a conceptual model of social infrastructure that supports health and wellbeing. *Cities Health* **2017**, *1*, 194–209.
54. Smit, L.A.; Hooiveld, M.; van der Sman-de Beer, F.; Opstal-van Winden, A.W.; Beekhuizen, J.; Wouters, I.M.; Yzermans, C.J.; Heederik, D. Air pollution from livestock farms, and asthma, allergic rhinitis and COPD among neighbouring residents. *Occup. Environ. Med.* **2014**, *71*, 134–140.
55. WHO. *ICD-11 for Mortality and Morbidity Statistics*; World Health Organization: Geneva, Switzerland, 2019.
56. Rachele, J.N.; Kavanagh, A.; Brown, W.J.; Healy, A.M.; Schmid, C.J.; Turrell, G. Neighborhood socioeconomic disadvantage and body mass index among residentially stable mid-older aged adults: Findings from the HABITAT multilevel longitudinal study. *Prev. Med.* **2017**, *105*, 271–274.
57. Rachele, J.N.; Giles-Corti, B.; Turrell, G. Neighbourhood disadvantage and self-reported type 2 diabetes, heart disease and comorbidity: A cross-sectional multilevel study. *Ann. Epidemiol.* **2016**, *26*, 146–150.
58. Badland, H.; Turrell, G.; Giles-Corti, B. Who does well where? Exploring how self-rated health differs across diverse people and neighborhoods. *Health Place* **2013**, *22*, 82–89.
59. Richardson, E.A.; Pearce, J.; Mitchell, R.; Kingham, S. Role of physical activity in the relationship between urban green space and health. *Public Health* **2013**, *127*, 318–324.
60. Ware, J.; Kosinski, M.; Gandek, B. *SF-36 Health Survey: Manual and Interpretation Guide Lincoln*; Quality Metric Incorporated: Johnston, RI, USA, 2000.
61. Cummins, R.A.; Eckersley, R.; Pallant, J.; Van Vugt, J.; Shelley, J.; Pusey, M.; Misajon, R.A. *Australian Unity Wellbeing Index*; Australian Centre on Quality of Life, Deakin University: Melbourne, Australia, 2001.
62. Davern, M. *The Subjective Wellbeing Evaluation Toolkit: A Resource to Support the Use of Subjective Wellbeing to Measure the Impact of Community Programs and Public Policy Initiatives*; University of Melbourne: Melbourne, Australia, 2016.
63. WHO. *Global Nutrition Targets 2025: Low Birth Weight Policy Brief*; World Health Organization: Geneva, Switzerland, 2019.
64. Turrell, G.; Haynes, M.; Burton, N.W.; Giles-Corti, B.; Oldenburg, B.; Wilson, L.-A.; Giskes, K.; Brown, W.J. Neighborhood disadvantage and physical activity: Baseline results from the HABITAT multilevel longitudinal study. *Ann. Epidemiol.* **2010**, *20*, 171–181.
65. Rachele, J.N.; Wood, L.; Nathan, A.; Giskes, K.; Turrell, G. Neighbourhood disadvantage and smoking: Examining the role of neighbourhood-level psychosocial characteristics. *Health Place* **2016**, *40*, 98–105.
66. Kamruzzaman, M.; Shatu, F.M.; Hine, J.; Turrell, G. Commuting mode choice in transit oriented development: Disentangling the effects of competitive neighbourhoods, travel attitudes, and self-selection. *Transp. Policy* **2015**, *42*, 187–196.
67. ABS.; IRSD. *The Index of Relative Socio-Economic Disadvantage*; Australian Bureau of Statistics: Canberra, Australia, 2018. Available online: <https://www.abs.gov.au/ausstats/abs@.nsf/Lookup/by%20Subject/2033.0.55.001~2016~Main%20Features~IRSD~19> (accessed on 8 February 2021).
68. Chakraborty, J.; Green, D. The relationship between industrial air pollution and social disadvantage in Australia: National and regional inequities. *Air Qual. Clim. Chang.* **2014**, *48*, 35–38.
69. Greife, M.; Stretesky, P.B.; Shelley, T.O.C.; Pogrebin, M. Corporate environmental crime and environmental justice. *Crim. Justice Policy Rev.* **2017**, *28*, 327–346.
70. Collins, T.W.; Grineski, S.E.; Nadybal, S. Social disparities in exposure to noise at public schools in the contiguous United States. *Environ. Res.* **2019**, *175*, 257–265.
71. Wilson, S.M.; Richard, R.; Joseph, L.; Williams, E. Climate change, environmental justice, and vulnerability: An exploratory spatial analysis. *Environ. Justice* **2010**, *3*, 13–19.
72. Spina, F.; McCormack, P.D.; Clarke, K.; Walfield, S. Environmental Enforcement: An Exploration of Latino Political Representation. *Sociol. Perspect.* **2019**, *62*, 308–324.
73. Lynch, M.J.; Stretesky, P.B.; Long, M.A. Environmental crime prosecutions in Ireland, 2004–2014. *Int. J. Comp. Appl. Crim. Justice* **2019**, *43*, 277–293.
74. Potvin, S.; Apparicio, P.; Séguin, A.-M. The spatial distribution of noise barriers in Montreal: A barrier to achieve environmental equity. *Transp. Res. Part D: Transp. Environ.* **2019**, *72*, 83–97.
75. Potvin, S. *La Distribution Spatiale des Écrans Antibruit dans la Région de Montréal: Une Barrière Sonore à L'équité Environnementale?* Institut National de la Recherche Scientifique, Université du Québec: Québec, Australia, 2019.
76. Carrier, M.; Apparicio, P.; Séguin, A.-M.; Crouse, D. School locations and road transportation nuisances in Montreal: An environmental equity diagnosis. *Transp. Policy* **2019**, *81*, 302–310.
77. Ruá, M.J.; Huedo, P.; Cabeza, M.; Saez, B.; Agost-Felip, R. A model to prioritise sustainable urban regeneration in vulnerable areas using SWOT and CAME methodologies. *J. Hous. Built Environ.* **2021**, *36*, 1603–1627.
78. Bond. *Principles and Checklist for Assessing the Quality of Evidence*; Bond, the International Development Network: London, UK, 2018.
