# Supplementary material
Source: MDPI journal article supplement (https://www.mdpi.com/2305-6703/2/1/8)
Supplement: s1 [file s1]

Archive with 1 entries (1 files):
- standards-1607841-supplementary.pdf
